1     **Changes in wheat rhizosphere microbiota in response to chemical inputs,**  
2                     **plant genotype and phenotypic plasticity**

3  
4     Samuel Jacquioud<sup>1</sup>, Tiffany Raynaud<sup>1</sup>, Eric Pimet<sup>1</sup>, Chantal Ducourtieux<sup>1</sup>, Leonardo Casieri<sup>2, 3</sup>  
5                     Daniel Wipf<sup>2</sup>, Manuel Blouin<sup>1\*</sup>

6  
7     <sup>1</sup>Agroécologie, AgroSup Dijon, INRAE, Univ. Bourgogne, Univ. Bourgogne Franche-Comté,  
8     F-21000 Dijon, France

9     <sup>2</sup>Agroécologie, AgroSup Dijon, CNRS, INRAE, Univ. Bourgogne, Univ. Bourgogne Franche-  
10     Comté, F-21000 Dijon, France

11     <sup>3</sup>Mycorrhizal Applications LLC, c/o BRDG Park at the Danforth Center. St. Louis, Missouri  
12     (USA)

13  
14     \*Corresponding author

15  
16     Correspondance:

17     Manuel Blouin

18     [manuel.blouin@agrosupdijon.fr](mailto:manuel.blouin@agrosupdijon.fr)

19  
20     **Running title:** Phenotypic plasticity of plant-microbiota interactions

21

## 22 **ABSTRACT**

23 Since modern wheat varieties are grown with chemical inputs, we ignore if changes observed  
24 in rhizosphere microorganisms between ancient and modern varieties are due to i) breeding-  
25 induced changes in plant genotype, ii) modifications of the environment via synthetic chemical  
26 inputs, or (iii) phenotypic plasticity, defined as the interaction between the genotype and the  
27 environment. In the field, we evaluated the effects of various wheat varieties (modern and  
28 ancient) grown with or without chemical inputs (N-fertilizer, fungicide and herbicide together)  
29 in a crossed factorial design. We analysed rhizosphere bacteria and fungi by amplicons  
30 sequencing and mycorrhizal association by microscopic observations. When considered  
31 independently of plant genotype, chemical inputs were responsible for an increase in dominance  
32 for bacteria and decrease in evenness for bacteria and fungi. Independently of inputs, modern  
33 varieties had richer and more even bacterial communities compared to ancient varieties.  
34 Phenotypic plasticity had a significant effect: bacterial and fungal diversity decreased when  
35 inputs were applied in ancient varieties but not in modern ones. Mycorrhiza were more  
36 abundant in modern than ancient varieties, and less abundant when using chemical inputs.  
37 Although neglected, phenotypic plasticity is important to understand the evolution of plant-  
38 microbiota associations and a relevant target in breeding programs.

39

40 **Keywords:** ancient varieties; bacteria; fungi; genotype; inputs; landraces; microbial  
41 community; modern varieties; mycorrhiza; phenotypic plasticity; rhizosphere; wheat

42

## 43 **INTRODUCITON**

44

45 Rhizosphere microbiota is involved in several key functions for the plant, such as the regulation  
46 of nutrient access, environmental disturbance tolerance and disease resistance (Rodriguez et al.,  
47 2008; Mei & Flinn, 2010; Farrar et al., 2014). There is abundant evidence that host genotypes  
48 have a significant influence on rhizosphere microbial community composition (Lundberg et al.,  
49 2012; Peiffer et al., 2013) and its function, with consequences on plant growth, development  
50 and immunity (Lemanceau et al., 2017). In agriculture, understanding factors that favour crop's  
51 associations with beneficial bacteria and fungi could help in maintaining high crop yields  
52 without using synthetic chemical inputs. Breeding and application of synthetic chemical inputs  
53 are two interconnected agricultural practices, which can modify plant-microbiota interactions.  
54 Therefore, studying the effect of domestication on the rhizosphere microbiota without  
55 considering chemical inputs does not allow an accurate understanding of the evolution of plant-  
56 microbiota interactions. The effects of breeding and inputs can be described by adopting the  
57 formalism of quantitative genetics  $P = G + E + G \times E$  (Falconer, 1989). In our case, the plant-  
58 microbiota interactions can be considered as a phenotypical trait "P", which can be determined  
59 by: (i) the plant genotype "G" (either modern or ancient varieties; microorganisms genotypes  
60 will not be considered explicitly here), (ii) the environment "E" (modified by agricultural  
61 practices such as the application of inputs) and (iii) the interaction between crop genotype and  
62 inputs "GxE" (defined as plant phenotypic plasticity). Indeed, previously reported observations  
63 call for considering these three important drivers of plant-microbiota interactions, which we  
64 will briefly present in the following order: E, G and GxE.

65 First, synthetic chemical inputs applied in the fields since the Green Revolution can be  
66 considered as a modification of the environment (E), with direct modifications of the soil and  
67 rhizosphere microbial communities. In a meta-analysis, long term mineral fertilizer application  
68 has been shown to increase microbial biomass by 15.1% (Geisseler and Scow, 2014).  
69 Fertilization can change microbial community composition, by promoting copiotroph

70 organisms such as specific members from Actinobacteria and Firmicutes, whereas decreasing  
71 the oligotroph organisms such as specific members from Acidobacteria and Verrucomicrobia  
72 (Ramirez et al. 2012). These modifications of the soil microbial communities can reverberate  
73 on the rhizosphere community. For example, nitrogen application selects less mutualistic  
74 rhizobia, with less benefit to the host (Weese et al. 2015). In a long-term experiment, Ai et al.  
75 (2015) demonstrated that inorganic fertilization decreased the rhizospheric dependence on root  
76 derived carbon for Actinobacteria members. Similarly, plants-AMF (arbuscular mycorrhizal  
77 fungi) symbiotic association can also be altered by inorganic fertilization (Lamber et al., 2009),  
78 with changes in the diversity of AMF (Egerton-Warburton et al., 2007).

79 Second, some changes in plant-microbiota interactions can arise from modifications in the plant  
80 genome (G), through mutation, hybridization or allele fixation. Domesticated plants changed  
81 their interactions with soil microorganisms compared to their wild relatives (Garcia-Palacios et  
82 al., 2013; Milla et al., 2015; Turcotte et al., 2015). Artificial selection for improved yield in  
83 high-input agriculture could unintentionally lead to a reduction of root microbiota members  
84 involved in nutrient acquisition or plant immunity under low input conditions (Perez-Jaramillo  
85 et al., 2016). The effect of domestication (from wild relatives to cultivated crops) on rhizosphere  
86 microbiota has been observed in several crops such as barley (Bulgarelli et al., 2015), maize  
87 (Szoboszlay et al. 2015), foxtail millet (Chaluvadi and Bennetzen, 2018) and common bean  
88 (Perez-Jaramillo et al., 2017). In wheat, the rhizosphere bacterial communities of ancient  
89 varieties was more diverse than modern varieties (Germida and Siciliano, 2001). The general  
90 pattern is a rhizospheric enrichment of Actinobacteria and Proteobacteria members and a  
91 decrease in Bacteroidetes members in modern varieties compared to wild relatives (Perez-  
92 Jaramillo et al., 2018). Changes in plant-microbes interactions between wild relatives, ancient  
93 varieties and modern varieties were also observed for mycorrhizal associations. Many studies  
94 showed that the mycorrhizal association and responsiveness of modern wheat varieties in terms

95 of yield gain was lower than that of the ancient varieties or wild relatives (Kapulnik and Kushnir  
96 1991; Hetrick et al., 1992; Zhu et al., 2001; Leiser et al., 2016). However, a meta-analysis  
97 showed that modern varieties were less intensely colonized but were more mycorrhiza-  
98 responsive compared to ancestral genotypes, concluding on the absence of evidence that  
99 agricultural and breeding practices are responsible for a lack of response to mycorrhiza in new  
100 crop genotypes (Lehmann et al., 2012).

101 Third, artificial selection may have influenced the way plant genotypes respond to inputs in  
102 terms of plant-microbiota interaction (G×E), i.e. the phenotypic plasticity of plant-microbiota  
103 interaction. Phenotypic plasticity denotes the ability of a genotype to exhibit changes in a  
104 specific trait across different environments (Laitinen et al., 2019). Artificial selection of modern  
105 varieties has been very efficient in providing agriculture with productive cultivars displaying  
106 stable performances across diverse environmental conditions, but it is not clear if these stable  
107 yields are linked to the phenotypic plasticity of other traits (Gage et al., 2017), such as those  
108 involved in plant-microbiota interaction. Several authors thus suggest that understanding G×E  
109 interactions could be a novel breeding strategy, coping better with changing environments while  
110 securing stable yields. Since genes responsible for yield (i.e. mean trait value) and phenotypic  
111 plasticity (i.e. variance) are distinct, breeders should theoretically be able to select both at the  
112 same time to generate plastic varieties that adapt better to a changing environment, while  
113 maintaining a decent yield (Kusmec et al., 2017).

114 Therefore, it is necessary to evaluate the relative importance of E, G and the G×E interaction  
115 for a more accurate understanding of the plant-microbiota interactions in the rhizosphere of  
116 selected crops. Specifically, evaluating the contribution of these parameters can help to  
117 determine if artificial selection has played an important role in the evolution of plant-microbiota  
118 interactions through genetic effects, being either independent (G) or dependent (G×E) of the  
119 environment. In this aim, we studied the structure of rhizosphere microbial community of

120 ancient and modern varieties of wheat, in the presence or absence of inputs (N-fertilizer,  
121 fungicide and herbicide). We hypothesized that i) the presence of inputs decreases the microbial  
122 diversity in the rhizosphere, ii) modern genotypes have lost their ability to establish interactions  
123 with some microbial species, iii) the lower plant-microbiota association in modern genotypes  
124 is amplified in the presence of inputs. We used an integrated approach coupling the analysis of  
125 microscopic observations of mycorrhiza, and amplicon sequencing of the bacterial (16S rRNA  
126 gene) and fungal (ITS2) communities.

127

## 128 **MATERIALS AND METHODS**

### 129 **Field site description**

130 The field experiment was conducted on dedicated plots at AgroSup Dijon, the Institut National  
131 Supérieur des Sciences Agronomiques de l'Aliment et de l'Environnement (47 ° 18'32 "N 5 °  
132 04'02" E, Dijon, France). The climate of the experimental area is semi-continental, with an  
133 average annual temperature of 11 °C ( $\pm 4.5^\circ\text{C}$ ). Average precipitation per year is 760.5 mm,  
134 monthly sunshine hours are 1848.8 h. The clay loam soil characteristics in the 0-22 cm horizon  
135 were as follow:  $\text{pH}_{\text{H}_2\text{O}} = 8.0$ ; 34.6% clay, 36.2% loam, 29.2% sand; 26.7  $\text{g.kg}^{-1}$  organic carbon  
136 (46.2  $\text{g.kg}^{-1}$  organic matter), 2.11  $\text{g.kg}^{-1}$  total nitrogen; 294.0  $\text{g.kg}^{-1}$  total Ca; 0.020  $\text{g.kg}^{-1}$   $\text{P}_2\text{O}_5$ ;  
137 24.30  $\text{cmol}^+.\text{kg}^{-1}$ . The preceding culture was a field bean (*Vicia faba*) for all the experimental  
138 plots.

### 139 **Experimental design and sampling**

140 Two kinds of genotypes, hereafter called "breeding types" consisting of five modern and five  
141 ancient wheat varieties were sown in the 3<sup>th</sup> and 4<sup>th</sup> of November 2016. Modern varieties were  
142 selected after the 60's in agrosystems concomitantly receiving high levels of inputs: Rubisko  
143 (R, 2012) provided by RAGT Semences, Descartes (D, 2014) and Sherlock (S, 2015) provided

144 by Secobra, Alixan (A, 2005) provided by Limagrain and Tulip (T, 2011) provided by Saaten  
145 Union (<http://www.fiches.arvalis-infos.fr/>). Ancient varieties were provided by the non-  
146 governmental organization “Graines de Noé” (<http://www.graines-de-noe.org/>), which  
147 promotes the conservation of wheat landraces. Among their 200 varieties, all grown without  
148 inputs, we selected some with a local origin: Barbu du Mâconnais (BM, XIXth–beginning XXth  
149 century), Blé de la Saône (BS, before 1960), Automne Rouge (AR, XIXth century). To diversify  
150 the panel of wheat grown without synthetic inputs, we also selected Alauda (AL), a variety  
151 dedicated for organic agriculture or biodynamic, obtained in 2013 by crossing the varieties  
152 Probus (1948) and Inntaler (before 1960) and einkorn wheat (*Triticum monococcum*, EW)  
153 which is increasingly grown by farmers interested in ancient varieties  
154 (<https://urgi.versailles.inra.fr/Projects/Achieved-projects/Siregal>). Two growing conditions  
155 were tested for each variety: i) with inputs (w) and ii) without inputs (w/o), with three replicates  
156 of each condition distributed in three blocks. Inputs included fertilizer (CAN 27% Granulé,  
157 Dijon Céréales, France) for a total of 150 kg N.ha<sup>-1</sup>, applied as 50 kg N.ha<sup>-1</sup> in three times, on  
158 week 18 after sowing (09/03/2017), week 25 (24/04/2017) and week 30 (30/05/2017));  
159 herbicide (Bofix™, Dow Agro Science, supplied once at 0.3 l.ha<sup>-1</sup> on week 23, the 10/04/2017);  
160 and fungicide (Bell Star™, Dow Agro Science), applied once at 2.5 kg.ha<sup>-1</sup> on week 26, the  
161 05/05/2017. The experiment thus consisted in 60 plots (five modern and five ancient varieties,  
162 with or without inputs, replicated three times) of 1m<sup>2</sup> each, separated from the other by 0.8m.  
163 In each plot, 300 seeds of each variety were sown manually in seven rows.

#### 164 **Sampling of rhizosphere microbial communities**

165 In each plot, we sampled randomly two wheat rhizospheres. After loosening the soil with a fork,  
166 the root system of the plant with its root-adhering soil was extracted from the bulk soil. In the  
167 laboratory, rhizosphere soil was gently removed from the roots by brushing. The two samples

168 from the same plot were pooled together to obtain a representative sample. All samples were  
169 frozen at -20°C until further processing for DNA extraction.

### 170 **Microbial community analysis**

171 Total bacterial and fungal diversity and composition from rhizosphere soil samples were  
172 respectively analyzed by sequencing the 16S rRNA gene V3-V4 region, and the ITS2 region  
173 via Illumina Miseq 2x 250 bp paired-end analysis. Total DNA was extracted from 250 mg of  
174 rhizospheric soil using the DNeasy PowerSoil-htp 96 well DNA isolation kit (Qiagen, France).  
175 In two steps, 16S rRNA gene and ITS2 amplicons were generated for all extracts. In the first  
176 step, the V3-V4 hypervariable region of the bacterial 16S rRNA gene was amplified by  
177 polymerase chain reaction (PCR) using the fusion primers U341F (5'-  
178 CCTACGGGRRSGCAGCAG-3') and 805R (5'-GACTACCAGGGTATCTAAT-3'), with  
179 overhang adapters (forward: TCGTCGGCAGCGTCAGATGTGTATAAGAGACAG, reverse:  
180 GTCTCGTGGGCTCGGAGATGTGTATAAGAGACAG) to allow the successive addition of  
181 multiplexing index-sequences. Fungal ITS2 was amplified using the primers ITS3F (5'-  
182 GCATCGATGAAGAACGCAGC-3') and ITS4R (5'- TCCTCCGCTTATTGATATGC-3')  
183 with overhang adapters (forward:  
184 TCGTCGGCAGCGTCAGATGTGTATAAGAGACAGNNNNGCATCGATGAAGAACGC  
185 AGC, reverse:  
186 GTCTCGTGGGCTCGGAGATGTGTATAAGAGACAGNNNNTCCTCSSCTTATTGATA  
187 TGC) to allow the successive addition of multiplexing index-sequences. First step PCR and  
188 their thermal cycling conditions were as follows: 98°C for 3 min followed by 98°C for 30 s,  
189 55°C for 30 s and 72°C for 30 s (25 and 30 cycles for 16S rRNA and ITS genes, respectively)  
190 and a final extension for 10 min at 72°C. The PCR products of the first step were used as a  
191 template for the second step of PCR. The second PCR amplification added multiplexing index  
192 sequences to the overhang adapters using a unique combination of primers for each sample.



193 Thermal cycling conditions were as follows: 98°C for 3 mn followed by 98°C for 30 s, 55°C  
194 for 30 s and 72°C for 30 s (8 and 10 cycles for 16S rRNA and ITS genes, respectively) and a  
195 final extension for 10 min at 72°C. PCR products from the second step were deposited on a 2%  
196 agarose gel to validate amplification and amplicons size. Amplicon products were purified  
197 using HighPrep™ PCR Clean Up System (AC-60500, MagBio Genomics Inc., USA)  
198 paramagnetic beads using a 0.65:1 (beads:PCR product) volumetric ratio to eliminate DNA  
199 fragments below 100 bp in size and primers. Samples were normalized using SequalPrep  
200 Normalization Plate (96) Kit (Invitrogen, Maryland, MD, USA) and pooled using a 5 µl volume  
201 for each sample. The pooled sample library was concentrated using DNA Clean and  
202 Concentrator™-5 kit (Zymo Research, Irvine, CA, USA). The pooled library concentration was  
203 determined using the Quant-iT™ High-Sensitivity DNA Assay Kit (Life Technologies). The  
204 final pool concentration was adjusted to 4 nM before library denaturation and sequencing.  
205 Amplicon sequencing was performed on an Illumina MiSeq platform using Reagent Kit v2 [2  
206 x 300 cycles] (Illumina Inc., CA, US). Demultiplexing and trimming of Illumina adapters and  
207 barcodes was done with Illumina MiSeq Reporter software (version 2.5.1.3).

208

209 The 16S rRNA gene and ITS amplicon sequences were analyzed internally using a Python  
210 notebook (available upon request). Briefly, using PEAR with default settings, forward and  
211 reverse sequences were assembled. Additional quality checks were conducted using the QIIME  
212 pipeline and short sequences were removed (< 400 bp for 16S and < 300 bp for ITS). Reference  
213 based and *de novo* chimera detection, as well as clustering into operational taxonomic units  
214 (OTUs, hereafter called taxa) were executed using VSEARCH and the adequate reference  
215 databases (Greengenes' representative set of sequences for 16S rRNA gene and UNITE's ITS2  
216 reference dynamic dataset for ITS). We deliberately choose the OTU analysis over the  
217 Amplicon Sequence Variant analysis (ASVs) for consistency reasons, since the latter pipeline

218 is currently not available for fungal ITS sequences. The identity thresholds were appropriately  
219 set at 94 % for 16S and 97 % for ITS based on our routine internal calibration controls (mock  
220 communities) in order to get the most accurate resolution. For simplicity reasons, we refer only  
221 to 16S rRNA gene amplicon sequences as “bacterial”, since archaeal sequences were extremely  
222 rare. Taxonomy was allocated using UCLUST and the latest released Greengenes database  
223 (v.05/2013). For ITS, the taxonomy assignment was executed using BLAST algorithm and the  
224 UNITE reference database (v.7-08/2016). A summary table is provided in supporting  
225 information to present the sequenced samples and the number of sequences recovered (Table  
226 S1). Sequences have been submitted to the Sequence read Archive public repository (SRA,  
227 <https://www.ncbi.nlm.nih.gov/sra>), under the following accession numbers for the 16S rRNA  
228 gene amplicon dataset: SUB9063594; and for the ITS2 amplicon dataset: SUB9104701

229

### 230 **Alpha-diversity analysis of microbial communities**

231 To explore the sequencing completeness in terms of diversity recovery per sample, individual  
232 raw rarefaction curves were calculated using the "*vegan*" package in R (Fig. S1). After careful  
233 evaluation of the rarefaction curves, we identified a series of problematic samples coming from  
234 the same column in the 96-well plate, harboring significantly higher sequences counts but  
235 relatively lower OTU discovery rates than the others ( $p < 0.001$ ). In order to avoid biasing our  
236 conclusions, we decided not to consider those samples for further analyses. Due to the  
237 unevenness of sequencing depth and its consequences on diversity assessment, we applied  
238 random re-sampling for normalization of samples in each data set. The samples were rarefied  
239 at 14,000 for both bacteria and fungi. Those levels are considered to be appropriated for accurate  
240 alpha-diversity estimations based on best practices guidelines (Schöler et al., 2017). Alpha-  
241 diversity analysis was perform using the following indices: observed taxa richness (S),  
242 estimated richness (Chao-1), ACE (Abundance-based Coverage Estimator), Simpson index (1-

243 D, D = Dominance), Shannon index (H) and Equitability ( $J = H/\ln(S)$ ). Alpha-diversity indices  
244 were exported for bacteria and fungi. An additional PERMANOVA on the six diversity indices  
245 taken together was also performed to detect the overall effect of factors on bacterial and fungal  
246 diversity.

247

### 248 **Beta-diversity analysis of microbial communities**

249 For the beta diversity analysis, we used the rarefied dataset. In order to consistently analyze  
250 both bacterial and fungal profiles with the same method, we choose the Bray-Curtis  
251 dissimilarity index to generate the distance matrices (package '*vegan*', Dixon, 2003). The Bray-  
252 Curtis dissimilarity index was preferred over other metrics (e.g. UniFrac) as ITS sequences  
253 cannot be aligned to obtain a phylogenetic distance. We first assessed with PERMANOVA the  
254 significance of each factor on the structure of bacterial and fungal community. As only the  
255 breeding type and the block had a significant effect, a partial distance-based redundancy  
256 analysis (db-RDA) was used with the following model: breeding type + Condition (block)  
257 ('*capscale*' function, package '*vegan*', 10,000 permutations).

258

### 259 **Network analysis**

260 We investigated the structure of the modern and ancient wheat varieties rhizosphere microbiota  
261 using a network approach based on edge arithmetic (Jacquiod et al. 2020) to focus on OTU  
262 correlations that are specific of each type of breeding. We first calculated two separated partial  
263 correlation matrices amongst dominant rhizosphere OTUs (total summed counts = 100  
264 minimum, occurrence = 25/51 samples), one for the modern and one for the ancient varieties  
265 using Poisson Log Normal models (PLN, package '*PLNmodels*', Chiquet et al. 2019). This  
266 method allows the combining of several datasets, thus enabling the integration of both bacterial  
267 and fungal sequencing data together using the 'TSS' offset criteria (Total Sum Scaling). The

268 following model was built to account for the block effect for both modern and ancient varieties  
269 “~ 1 + block + offset”. The PLN models were validated by using the Bayesian Information  
270 Criterion (BIC) to determine the most appropriated sparsifying penalty levels (BIC,  $R^2$  ancient  
271 = 0.98 ;  $R^2$  modern = 0.97). We then applied edge arithmetic with the ‘*igraph*’ package  
272 functions (Csardi and Nepusz, 2006). Briefly, we intersected both modern and ancient networks  
273 to systematically determine whether correlations were common to both breeding types or  
274 specific of one breeding type. For visualization, the two networks were then merged and opened  
275 in the ‘*Cytoscape*’ software (Shannon et al. 2003). The complexity of networks was investigated  
276 by means of the degree index, the node betweenness and the edge betweenness.

277

### 278 **Mycorrhizal colonization**

279 Two root systems per plot were collected and pooled together 29 weeks after sowing, from the  
280 22<sup>th</sup> to the 24<sup>th</sup> of May 2017. Root material was washed thoroughly and prepared for staining  
281 as described in Vierheilig et al. (1998). Roots were cleared at 90°C for 5 to 10 min in 10%  
282 KOH, placed in black ink (5% in acetic acid) for 5 min at 90°C for coloration, rinsed with water  
283 and put for 25 min in 8% acetic acid at room temperature. Roots were rinsed again with water,  
284 covered with pure glycerol and stored at 4°C. For microscopic observation, roots were cut into  
285 1 cm fragments and 15 fragments were placed in glycerol between slide and slip cover four  
286 times per sample. There were two batches of microscope slides for convenience of counting,  
287 called “Series” in the statistical analysis. Mycorrhization rates were assessed according to  
288 Trouvelot et al. (1986) and expressed as mycorrhizal colonization i.e. frequency of root  
289 fragments with mycorrhizal structures at the root system scale (F), intensity of the mycorrhizal  
290 colonization at the root system scale (M) or restricted to mycorrhizal root fragments (m),  
291 arbuscule abundance at the root system scale (A) or restricted to mycorrhizal root fragments  
292 (a).

293

## 294 *Univariate statistical analysis*

295 The statistical analysis of univariate data, including alpha-diversity indices and mycorrhiza  
296 traits, was performed in Rstudio software (RStudio Team, 2020). Normality and  
297 homoscedasticity of the data was assessed using Shapiro and Bartlett test respectively using R  
298 default functions. Normally distributed data were analyzed with construction of an ANOVA  
299 model, significance was assessed using the D'Agostino test of skewedness on the residual  
300 variance (package '*moments*', Komsta and Novomestky, 2015), followed by a post-hoc  
301 Tukey'Honest Significant Detection test (Tukey's HSD,  $p < 0.05$ , package '*agricolae*', De  
302 Mendiburu, 2017). Non-parametric data were analyzed with a Kruskal-Wallis test followed by  
303 a post-hoc False Discovery Rate test correction to account for multiple testing (FDR,  $p < 0.05$ ,  
304 package '*agricolae*'). We present the percentage of variance explained and associated  $p$ -values  
305 from the ANOVA models if variables are normally distributed, and only the  $p$ -value from the  
306 Kruskal-Wallis test if not normally distributed.

307

## 308 **RESULTS**

### 309 **Effects of breeding types and inputs on bacterial community**

310 Breeding type (ancient *vs* modern varieties) had a significant effect on all bacterial alpha  
311 diversity indices, including the richness (explaining 15.56% of the total variance,  $p < 0.001$ ),  
312 Chao-1 (6.9%,  $p = 0.025$ ), ACE (5.9%,  $p = 0.044$ ), Simpson reciprocal ( $p = 0.044$ ), Shannon ( $p$   
313 = 0.002) and Equitability ( $p = 0.012$ ) (Tables 1, Table S2). The presence/absence of inputs had  
314 a barely significant effect on community evenness, including the Simpson reciprocal ( $p = 0.048$ )  
315 and Equitability ( $p = 0.057$ ) (Tables 1 and S2). The interaction between breeding type and  
316 inputs had a significant effect on richness (7.7%,  $p = 0.011$ ), ACE (6.8%,  $p = 0.031$ ), Simpson  
317 reciprocal ( $p = 0.013$ ), Shannon ( $p = 0.001$ ) and Equitability ( $p = 0.006$ ). The different varieties

318 inside each breeding type was the main source of variation for richness (46.1%,  $p = 0.009$ ),  
319 Chao1 (49.9%,  $p = 0.015$ ) and ACE (47.5%,  $p = 0.028$ ) indices. When the six diversity indices  
320 were analyzed simultaneously in a PERMANOVA (Table 2), we found an overall significant  
321 effect of the breeding type (7.4%,  $p = 0.013$ ) and its interaction with chemical inputs (5.7,  $p =$   
322 0.034). The variety error term inside breeding type was also significant (48.8%,  $p = 0.015$ ). The  
323 overall multivariate model explained 63.5% of the variance.

324 Regarding the direction of the effects of factors on bacterial diversity, we found that,  
325 considering both treatments with and without inputs together, modern varieties had richer and  
326 more even communities as compared to ancient varieties (Fig. 1). Considering both ancient and  
327 modern varieties together, the presence of inputs had significant effects only on evenness  
328 indices, with a slight increase in dominance of some taxa. However, the addition of inputs was  
329 responsible for a strong and significant decrease in diversity for ancient varieties for richness,  
330 Simpson reciprocal, Shannon and Equitability, but it had no effect on modern varieties (Fig. 1).

331 The PERMANOVA on bacterial community beta diversity (Table 3) showed that the breeding  
332 type (2.7%,  $p = 0.036$ ) and the block (6.5%,  $p < 0.001$ ) but not the inputs had a significant effect  
333 (1.8%,  $p = 0.701$ ). From this result, we profiled the structural changes in bacterial communities  
334 using a distance-based partial redundancy analysis on Bray-Curtis dissimilarities for breeding  
335 type only (the block effect was added as an error term). The total variance explained was 2.3%  
336 ( $p = 0.016$ ) and the first constrained component (CAP1) and first non-constrained component  
337 (MDS1) were explaining 2.5 and 4.2% of variance, respectively (Fig. 2A). Ordination plots  
338 indicated that bacterial community structure differed between breeding types.

### 339 **Effects of breeding types and inputs on fungal community**

340 Breeding type had no significant effect on fungal diversity (Table 4, Table S3). The  
341 presence/absence of inputs showed a significant effect on the Shannon diversity (6.7%,  $p =$

342 0.044). The interaction between breeding type and inputs had a significant effect on the Chao-  
343 1 estimation (13.9%,  $p = 0.025$ ). The effect of the different varieties inside each breeding type  
344 had no significant effect, despite a relatively high percentage of variance (Table S3). When the  
345 six diversity indices were analyzed simultaneously in a PERMANOVA (Table 2), we found no  
346 significant effects of inputs (0.4%,  $p = 0.765$ ), breeding type (0.02%,  $p = 0.995$ ), variety (11.8%,  
347  $p = 1.000$ ) and block (4.6%,  $p = 0.444$ ) alone, but the breeding x inputs interaction was  
348 responsible for an overall effect on fungal diversity indices, with 10.5% of explained variance  
349 ( $p = 0.053$ ). The overall multivariate model explained 27.3% of the variance.

350 Regarding the direction of effects, we found no effect of the breeding type or of the presence  
351 of inputs alone (Fig. 3). Ancient varieties in the absence of inputs had the highest observed  
352 fungal diversity (not significant after post-hoc correction for multiple comparison, likely due to  
353 the interference of the block effect). For most of the diversity indices, the addition of inputs  
354 induced a decrease in fungal diversity for ancient varieties and, conversely, an increase in  
355 diversity in modern varieties (Fig. 3). The significant interaction was illustrated by the crossing  
356 of all reaction norms, which was only supported statistically for the Chao-1 index.

357 The PERMANOVA on fungal community beta diversity showed that the breeding type (2.5%,  
358  $p = 0.052$ ), the block (5.4%,  $p = 0.011$ ) and variety (34.7%,  $p = 0.020$ ) had significant effects,  
359 but not the inputs (2.2%,  $p = 0.14$ ). Based on this result, we profiled the structural changes in  
360 fungal communities using a distance-based partial redundancy analysis based on Bray-Curtis  
361 dissimilarities for breeding types alone (the block effect was added as an error term). The total  
362 variance explained was 3.0% ( $p = 0.057$ ), and the first constrained component (CAP1) and first  
363 non-constrained component (MDS1) were explaining 2.76 and 13.50% of variance,  
364 respectively (Fig. 2B). As for bacterial community structure, ordination plots showed a  
365 differentiation trend in the fungal community structure between modern and ancient varieties  
366 while inputs addition had no effect.



## 367 **Network analysis**

368 The PLN models successfully converged into stable networks for the modern varieties (BIC  $R^2$   
369 = 0.97) and ancient varieties (BIC  $R^2$  = 0.98). The modern network featured 178 OTUs (nodes)  
370 and 452 edges (correlations) of which 245 were positive and 207 negative. The ancient network  
371 featured 185 OTUs (nodes) and 402 edges (correlations) of which 238 were positive and 164  
372 negative. The comparison between the two networks revealed a similar level of node degree  
373 (Fig. 4A), but a significantly higher level of centrality in the ancient network based on average  
374 betweenness (either on nodes:  $p = 0.05$ ; and on edges  $p = 4.93 \cdot 10^{-14}$ ; Fig. 4BC). The positive-  
375 to-negative edge ratio was in favour of more positive correlations in the ancient network (1.40  
376 vs 1.14). When combining both networks and highlighting the position of common and unique  
377 edges found either in modern or ancient varieties, a clear distinction was found, with a clearly  
378 different interaction structure depending on the breeding type (Fig. 4A). In total, this combined  
379 network featured 252 unique OTUs, amongst which 108 were common to both breeding type,  
380 while 76 were unique of the ancient varieties and 68 of the modern varieties. Most OTUs were  
381 affiliated to Ascomycota (55%), which clearly dominated both networks.

## 382 **Mycorrhizal colonization response to breeding types and inputs**

383 The frequency of mycorrhization,  $F$ , (number of mycorrhizal root fragments divided by the total  
384 number of observed fragments) was affected neither by the breeding type, the inputs nor their  
385 interaction (Table 5 and S4). Breeding types had an impact on the intensity of mycorrhizal  
386 colonization in root system M (explaining 4.3% of total variance,  $p = 0.005$ ), in mycorrhizal  
387 root fragments m (4.5%,  $p = 0.009$ ), as well as on arbuscule abundance in root system A ( $p =$   
388 0.018) and in mycorrhizal root fragments a (5.6%,  $p = 0.002$ ). Inputs had an impact only on the  
389 intensity of mycorrhizal colonization in root system M (explaining 2.6% of the total variance,  
390  $p = 0.027$ ) and in mycorrhizal root fragments m (2.6%,  $p = 0.046$ ). The interaction between  
391 breeding type and inputs was only significant on arbuscular abundance in root system A ( $p =$



392 0.032, Table 5). When performing a PERMANOVA on all mycorrhiza indices, a significant  
393 breeding effect was detected, in favor of higher index values for the modern varieties (2.8%,  $p$   
394 = 0.008, Table 2). The overall multivariate model explained % of the variance. Regarding the  
395 direction of effects, mycorrhiza colonization was higher in modern varieties compared to  
396 ancient ones (Fig. 5ABCD) and the application of inputs decreased the intensity of mycorrhizal  
397 colonization in the root system and root fragment (Fig. 5EF).

398

## 399 **DISCUSSION**

400 Modern varieties of wheat were selected and generally grown with synthetic chemical inputs  
401 whereas ancient varieties were selected and grown without this kind of inputs, in organic  
402 farming systems. This correlation between variation in genotype and environment prevent to  
403 assess the relative importance of individual factors (E and G) and their interaction (G×E) in  
404 plant-microbiota relationships. In addition, comparison between modern and ancient varieties  
405 are generally made in controlled conditions in the absence of inputs or in nutrient depleted soils,  
406 which prevents any realistic conclusion on the evolution of plant-microbiota relationships in  
407 the field, since modern varieties are grown with inputs. Our results are a first attempt to quantify  
408 these environmental and genotypic effects independently, in the field.

### 409 **Effects of inputs on plant-microbiota interactions**

410 The presence/absence of inputs – here considered as our environmental conditions “E” – had a  
411 low impact on plant-microbiota relationships. When considered independently of the breeding  
412 type, inputs had only a slight significant effect on microbial alpha-diversity, via a lowering of  
413 specific evenness indices when applied, thus indicating an increased dominance of some  
414 microbial OTUs (Fig. 1 & 3; Tables 2 & 4; Tables S2 & S4). The intensity of mycorrhizal  
415 colonization was higher in the absence than in the presence of inputs (M and m, Table 5 and

416 Fig. 5). However, this had no consequence on the intensity of arbuscule development (A and a,  
417 Table 5 and Fig. 5), and thus likely no functional impact. The presence/absence of inputs also  
418 had no effect on the overall composition of fungal and bacterial communities in the rhizosphere  
419 (Fig. 2). Taken together, these results support our first hypothesis that the presence of inputs  
420 decreases the microbial diversity in the rhizosphere. This decrease in diversity in the presence  
421 of inputs was expected for several reasons. First, the addition of N fertilizer can induce a shift  
422 in bacterial communities. In line with our results, Grunert et al. (2019) reported that the addition  
423 of an inorganic fertilizer (struvite) reduced the diversity (Pielou equitability, Shannon and  
424 Simpson reciprocal) of tomato rhizosphere microbiota. In a study with two sites where N was  
425 added for 27 and 8 years, the authors found that bacterial community structure was highly  
426 responsive to N additions, but the diversity of bacterial community did not have a consistent  
427 response (Ramirez et al., 2010). As a matter of fact, the shift in bacterial community  
428 composition is mainly observed in soils with low C and N concentrations (Ramirez et al., 2012).  
429 The C and N concentrations in our soil presented a medium value, which could explain the  
430 weak effect of nitrogen fertilization effect. Second, the effect of fungicide could have  
431 suppressed some fungal taxa. It has been shown that commonly used fungicides with foliar  
432 application had moderate but significant effect on the composition of fungal communities in  
433 the wheat phyllosphere (Karlsson et al., 2014). While fungicides are supposed to target specific  
434 fungal pathogens, the impact on fungal communities has been already observed (Esmaeili  
435 Taheri et al., 2015). Third, the effect of herbicide could have modified the weed community,  
436 which in turn could have influenced microbial community, although this mechanism has not  
437 been studied yet, to our knowledge. Our weak observations can also be explained by the fact  
438 that inputs are often reported to affect *bulk soil* microbial communities, whereas *rhizosphere*  
439 microbial communities are more dependent on plant factors than on soil properties (Grunert et  
440 al., 2019).

## 441 **Effects of breeding on plant-microbiota interactions**

442 The breeding type – here considered as the genotype G – had a strong effect on rhizosphere  
443 microbial communities, which was dependent on the microbial taxa (bacteria or fungi), meaning  
444 that plant-microbiota relationships were differently influenced by breeding from ancient to  
445 modern varieties. When considering the impact of the genotype independently of the use of  
446 inputs, we found that breeding type affected bacterial diversity, with a percentage of explained  
447 variance from 5.9 to 15.6% of the variance according to the index (Table S2) and 7.4% of the  
448 variance when all indices were analyzed together (Table 2). The variety inside each breeding  
449 type was the strongest determinant of bacterial diversity, explaining 46.1 to 49.9% of the total  
450 variance, and 48.8% when all indices were analyzed together, stressing the importance of  
451 genotype. Conversely, the breeding type had no effect on fungal diversity (Table S3). However,  
452 all mycorrhiza indices (except F) were higher with modern varieties compared to ancient ones  
453 (Table 5, Table 2, Fig. 5). The breeding type also affected slightly the overall composition of  
454 fungal and bacterial communities (Table 3, Fig. 2), but its strongest effect was noticed on the  
455 structure of the rhizosphere microbiota network (Fig. 4). Indeed, the different breeding types  
456 featured completely distinct co-occurrence links amongst the dominant microbial OTUs, which  
457 resulted in a significantly less complex network for the modern varieties compared to the  
458 ancient ones. Therefore, our results partially invalidated the second hypothesis that modern  
459 genotypes have lost their ability to establish interactions with microbial species, as we  
460 evidenced that this interaction still exists and may even be reinforced in the case of mycorrhiza.  
461 However, the interaction with bacteria and other fungal members has been completely  
462 restructured into a simplified form.

463 Although this hypothesis is supported by several studies in the literature, there is no consensus.  
464 Among supporting results, Valente et al. (2020) found that ancient wheat varieties were more  
465 capable of interacting with beneficial plant growth rhizobacteria than modern varieties.

466 Moreover, a decrease in the diversity of symbiotic rhizobia associations has been observed in  
467 domesticated legumes compared to wild relatives (Kim et al. 2014; Sangabriel-Conde et al.  
468 2015). Mutch and Young (2004) reported that the ability to interact with symbionts was limited  
469 for modern pea and broad bean as compared to wild relatives of the *Vicia* and *Lathyrus* genera  
470 in a non-agricultural soil without inputs. Other studies found more nuanced results: Leff et al.  
471 (2016) reported that neither root nor rhizosphere bacterial communities were affected by  
472 sunflower domestication, but domestication did affect the composition of rhizosphere fungal  
473 communities. Brisson et al. (2019) reported similar Shannon index for prokaryotic or fungal  
474 communities in teosinte, inbred and modern varieties; they observed that co-occurrence  
475 network of microbiota of inbred maize lines' rhizosphere were significantly closer from those  
476 of the teosintes than to the modern hybrids. Opposed results also exist: Kinnunen-Grubb et al.  
477 (2020) reported that bacterial colonization in the roots of modern cultivars of wheat is faster  
478 than in ancestors. This could be explained by the fact that modern varieties could have lost their  
479 ability to specifically select for beneficial microbial partners compared to ancient varieties  
480 (Kiers and Denison, 2008). Indeed, with six soybean cultivars representing 60 years of  
481 breeding, Kiers et al. (2007) showed that ancient varieties were more performant than modern  
482 varieties in maintaining a high fitness (seed production) when infected with a mixture of  
483 effective and ineffective rhizobia strains. This lower selectivity of modern varieties could  
484 explain the associated higher diversity in rhizosphere microbiota that we observed in the  
485 presence of inputs. However, a meta-analysis on the effects of breeding on mycorrhizal  
486 responsiveness found that varieties released after 1950 were more mycorrhizal-responsive (in  
487 terms of increased biomass production) than old varieties (1900-1950) and ancestors (before  
488 1900) (Lehmann et al., 2012). So the fact that modern varieties establish either adaptive or non-  
489 adaptive interactions with soil microbiota remains an open question (see Ghalambor et al., 2007

490 for in-depth discussion). The aim of our experiment was not to evaluate the fitness gain due to  
491 plant-microbiota interactions, but it would be an interesting perspective.

492

### 493 **Effects of phenotypic plasticity on plant-microbiota interactions**

494 We speculate that these contradictory results regarding the effect of breeding could be due to  
495 the interaction between plant genotype and the environment. Our experimental design allowed  
496 to assess whether variations in plant-microbiota interaction are affected by the interaction  
497 between the breeding type and the presence of inputs, called phenotypic plasticity. Namely,  
498 phenotypic plasticity describe the capability of a genotype to produce different phenotypes in  
499 response to variation in environmental conditions (Gause, 1947; Bradshaw, 1965). It is an  
500 ubiquitous aspect of organisms. The profile of phenotypes produced by a genotype across  
501 environments is the "norm of reaction" (Schmalhausen, 1949; Stearns, 1989).

502

503 Indeed, phenotypic plasticity – here considered as the G×E interaction – had an important  
504 impact on plant-microbiota relationships. It affected several indices of bacterial and fungal  
505 diversity (Tables 1 and 3, Tables S2 and S3, Figs. 1 and 3). For the bacterial community, this  
506 effect of phenotypic plasticity (5.7%) was in the same range as the effect of the breeding type  
507 (7.4%, Table 2). For the fungal community, the effect of the breeding type was not significant,  
508 whereas the effect of phenotypic plasticity was significant and relatively important when  
509 considering all indices together (10.5%, Table 2). However, phenotypic plasticity had no impact  
510 on the intensity of mycorrhizal colonization (Table 5) or on the overall structure of bacterial  
511 and fungal communities (Table 3). This G×E interaction was key in understanding the  
512 variations of diversity: ancient varieties had a decreased bacterial and fungal diversity in the  
513 presence compared to the absence of inputs, whereas modern varieties kept diverse rhizosphere  
514 microbial community in the presence of inputs. This contradicts our third hypothesis that the

515 lower plant-microbiota association with modern genotypes is amplified in the presence of  
516 inputs. The literature reports many cases of interaction between genotype and environment for  
517 other plant traits and considering plasticity as a trait among others allows finding out some  
518 genetic determinant of plasticity. For example, grain yield variation in maize was found to result  
519 from the environment (a large geographic and climatic transect of North American) for 43%,  
520 genotype for 7% and G×E for 6% (see Gage et al. 2017, Supp. Fig. 4). The authors found that  
521 genomic regions that have experienced changes in allele frequency due to selection for  
522 productivity in temperate conditions explain less G×E variation than regions in which allele  
523 frequency was unaffected by selection. Loci associated with G×E interaction were mainly  
524 located in the regulatory regions of the genome (Gage et al., 2017). Regarding plant-microbiota  
525 interactions, it has been observed in *Boechera stricta* (Brassicaceae), a perennial wild mustard  
526 grown in various sites in North America, that the G×E effect on microbial community was  
527 stronger for the phyllosphere than the rhizosphere, with an impact on the Shannon index greater  
528 than the impact of the genotype itself (but the opposite was true for Chao1) (Wagner et al.,  
529 2016). We found one experiment considering both wild relatives and cultivated varieties and  
530 the manipulation of inputs as an environmental variation (Shi et al. 2019). Using one single  
531 ancient and modern varieties of soybean and rice, they reported that the rhizosphere microbiota  
532 of wild relatives are more affected by a fungicide than the cultivated ones and that the G×E  
533 interaction had a significant effect on fungal community. However, they did not discuss their  
534 results in terms of phenotypic plasticity.

535

536

537 **CONCLUSION**

538

539 The evolution of the phenotypic plasticity of plant-microbiota interactions has been neglected  
540 up to now by microbial ecologists and geneticists. This knowledge gap makes difficult any  
541 robust conclusion on the fact that modern varieties have lost or improved their ability to interact  
542 with soil microbiota. Our results suggest that modern varieties are less sensitive to the negative  
543 effect of inputs on plant-microbiota interactions than ancient varieties. This could be explained  
544 by a loss of ability to regulate plant-microbiota interactions according to soil fertility in modern  
545 varieties, in accordance the results of Gage et al. (2017) showing that G×E variation is  
546 disproportionately controlled by regulatory mechanisms as compared with other traits. This is  
547 coherent with the fact that modern varieties were not exposed to huge variations of soil fertility  
548 such as ancient ones, as they have been selected and grown in the presence of inputs. So there  
549 were less selective constraints on the modern regarding the ability to fit with the heterogeneity  
550 of soil fertility. However, environmental pollution by synthetic chemical inputs will likely lead  
551 to grow crops with less inputs, so in environments with more heterogeneous levels of fertility.  
552 Integrating phenotypic plasticity in plant-microbiota interactions as a target in future breeding  
553 programs could be very useful to obtain varieties with high yield, but able to finely adapt their  
554 interactions with microbiota to variations in soil fertility.

555

## 556 **ACKNOWLEDGEMENTS**

557 We thank AgroSup Dijon for experimental facilities. We are grateful to Jean-Philippe  
558 Guillemin, Wilfried Queyrel and Etienne Gaujour for their advices in wheat culture and the  
559 management of the experimental site. We thank Tariq Shah for his contribution to the  
560 bibliographical search. We also thank Graines de Noé, especially Hélène Montaz, for  
561 providing the seeds of ancient varieties, as well as RAGT Semences, Secobra, Saaten Union  
562 and Limagrain for providing the modern varieties.

563

564 **AUTHOR CONTRIBUTIONS**

565 MB conceived the research, MB and TS wrote the paper, CD, EP and MB carried out the  
566 experiment, SJ dealt with sample preparation for sequencing and bioinformatics analysis, SJ  
567 and TS did the statistical analyses and edited the figures and tables, DW, LC and TR did the  
568 mycorrhiza observations, SJ, TR, LC and DW edited and commented the paper.

569

570 **FUNDING**

571 Samuel Jacquioud was funded by the University of Bourgogne Franche-Comté via the ISITE-  
572 BFC International Junior Fellowship award (AAP3:RA19028.AEC.IS).

573

574 **CONFLICT OF INTEREST**

575 The authors declare no conflict of interest.

576



577 **REFERENCES**

- 578 Ai, C., Liang, G., Sun, J., Wang, X., He, P., Zhou, W., & He, X. (2015). Reduced dependence  
579 of rhizosphere microbiome on plant-derived carbon in 32-year long-term inorganic and organic  
580 fertilized soils. *Soil Biology and Biochemistry*, 80, 70-78.
- 581 Bradshaw, A. D. (1965). Evolutionary significance of phenotypic plasticity in plants. *Advances*  
582 *in Genetics*, 13, 115–155.
- 583 Brisson, V. L., Schmidt, J. E., Northen, T. R., Vogel, J. P., & Gaudin, A. C. (2019). Impacts of  
584 maize domestication and breeding on rhizosphere microbial community recruitment from a  
585 nutrient depleted agricultural soil. *Scientific reports*, 9(1), 1-14.
- 586 Bulgarelli, D., Garrido-Oter, R., Münch, P. C., Weiman, A., Dröge, J., Pan, Y., ... & Schulze-  
587 Lefert, P. (2015). Structure and function of the bacterial root microbiota in wild and  
588 domesticated barley. *Cell host & microbe*, 17(3), 392-403.
- 589 Chaluvadi, S., & Bennetzen, J. L. (2018). Species-associated differences in the below-ground  
590 microbiomes of wild and domesticated *Setaria*. *Frontiers in plant science*, 9, 1183.
- 591 Chiquet, J., Robin, S., & Mariadassou, M. (2019). Variational inference for sparse network  
592 reconstruction from count data. In *International Conference on Machine Learning* (pp. 1162-  
593 1171). PMLR.
- 594 Csardi, G., & Nepusz, T. (2006). The igraph software package for complex network research.  
595 *InterJournal, complex systems*, 1695(5), 1-9.
- 596 De Mendiburu, F. (2017). Package ‘Agricolae’: Statistical Procedures for Agricultural  
597 Research, R Package Version 1.2–4.
- 598 Dixon, P. (2003). VEGAN, a package of R functions for community ecology. *Journal of*  
599 *Vegetation Science*, 14(6), 927-930.

- 600 Egerton-Warburton, L. M., Johnson, N. C., & Allen, E. B. (2007). Mycorrhizal community  
601 dynamics following nitrogen fertilization: a cross-site test in five grasslands. *Ecological*  
602 *monographs*, 77(4), 527-544.
- 603 Esmacili Taheri, A., Hamel, C., & Gan, Y. (2015). Pyrosequencing reveals the impact of foliar  
604 fungicide application to chickpea on root fungal communities of durum wheat in subsequent  
605 year. *Fungal Ecology*, 15, 73–81. <https://doi.org/10.1016/j.funeco.2015.03.005>
- 606 Falconer, D.S., 1989. *Introduction to quantitative genetics*. Longman, London.
- 607 Farrar, K., Bryant, D., & Cope-Selby, N. (2014). Understanding and engineering beneficial  
608 plant–microbe interactions: plant growth promotion in energy crops. *Plant biotechnology*  
609 *journal*, 12(9), 1193-1206.
- 610 Gage, J. L., Jarquin, D., Romay, C., Lorenz, A., Buckler, E. S., Kaeppeler, S., ... de Leon, N.  
611 (2017). The effect of artificial selection on phenotypic plasticity in maize. *Nature*  
612 *Communications*, 8, 1348.
- 613 García-Palacios, P., Maestre, F. T., Kattge, J., & Wall, D. H. (2013). Climate and litter quality  
614 differently modulate the effects of soil fauna on litter decomposition across biomes. *Ecology*  
615 *letters*, 16(8), 1045-1053.
- 616 Gause, G. F. (1947). Problems of evolution. *Trans. Conn. Acad. Sci.*, 37, 17–68.
- 617 Geisseler, D., & Scow, K. M. (2014). Long-term effects of mineral fertilizers on soil  
618 microorganisms - A review. *Soil Biology and Biochemistry*, 75, 54–63.  
619 <https://doi.org/10.1016/j.soilbio.2014.03.023>
- 620 Germida, J., & Siciliano, S. (2001). Taxonomic diversity of bacteria associated with the roots  
621 of modern, recent and ancient wheat cultivars. *Biology and Fertility of Soils*, 33(5), 410-415.

- 622 Ghalambor, C.K., McKay, J.K., Carroll, S.P., Reznick, D.N., 2007. Adaptive versus non-  
623 adaptive phenotypic plasticity and the potential for contemporary adaptation in new  
624 environments. *Functional Ecology* 21, 394–407. [https://doi.org/10.1111/j.1365-](https://doi.org/10.1111/j.1365-2435.2007.01283.x)  
625 [2435.2007.01283.x](https://doi.org/10.1111/j.1365-2435.2007.01283.x)
- 626 Grunert, O., Robles-Aguilar, A. A., Hernandez-Sanabria, E., Schrey, S. D., Reheul, D., Van  
627 Labeke, M. C., ... & Temperton, V. M. (2019). Tomato plants rather than fertilizers drive  
628 microbial community structure in horticultural growing media. *Scientific reports*, 9(1), 1-15.
- 629 Hetrick, BAD, Wilson, GWT, & Cox, TS (1992). Mycorrhizal dependence of modern wheat  
630 varieties, landraces, and ancestors. *Canadian Journal of Botany*, 70 (10), 2032-2040.
- 631 Jacquioid, S., Puga-Freitas, R., Spor, A., Mounier, A., Monard, C., Mougel, C., ... & Blouin, M.  
632 (2020). A core microbiota of the plant-earthworm interaction conserved across soils. *Soil*  
633 *Biology and Biochemistry*, 144, 107754.
- 634 Kapulnik, Y., & Kushnir, U. (1991). Growth dependency of wild, primitive and modern  
635 cultivated wheat lines on vesicular-arbuscular mycorrhiza fungi. *Euphytica*, 56(1), 27-36.
- 636 Karlsson, I., Friberg, H., Steinberg, C., & Persson, P. (2014). Fungicide effects on fungal  
637 community composition in the wheat phyllosphere. *PLoS ONE*, 9(11), e111786.  
638 <https://doi.org/10.1371/journal.pone.0111786>
- 639 Kiers, E. T., & Denison, R. F. (2008). Sanctions, cooperation, and the stability of plant-  
640 rhizosphere mutualisms. *Annual Review of Ecology, Evolution, and Systematics*, 39, 215-236.
- 641 Kiers, E. T., Hutton, M. G., & Denison, R. F. (2007). Human selection and the relaxation of  
642 legume defences against ineffective rhizobia. *Proceedings of the Royal Society B: Biological*  
643 *Sciences*, 274(1629), 3119-3126.

- 644 Kim, B. H., Ramanan, R., Cho, D. H., Oh, H. M., & Kim, H. S. (2014). Role of Rhizobium, a  
645 plant growth promoting bacterium, in enhancing algal biomass through mutualistic interaction.  
646 *Biomass and Bioenergy*, 69, 95-105.
- 647 Kinnunen-Grubb, M., Sapkota, R., Vignola, M., Nunes, I. M., & Nicolaisen, M. (2020).  
648 Breeding selection imposed a differential selective pressure on the wheat root-associated  
649 microbiome. *FEMS Microbiology Ecology*, 96(11), fiae196.
- 650 Komsta, L., & Novomestky, F. (2015). Moments, cumulants, skewness, kurtosis and related  
651 tests. R package version, 14.
- 652 Kusmec, A., Srinivasan, S., Nettleton, D., & Schnable, P. S. (2017). Distinct genetic  
653 architectures for phenotype means and plasticities in *Zea mays*. *Nature Plants*, 3, 715–723.
- 654 Laitinen, R. A. E., & Nikoloski, Z. (2019). Genetic basis of plasticity in plants. *Journal of*  
655 *Experimental Botany*, 70(3), 739–745.
- 656 Lambers, H., Mougel, C., Jaillard, B., & Hinsinger, P. (2009). Plant-microbe-soil interactions  
657 in the rhizosphere: an evolutionary perspective. *Plant and soil*, 321(1-2), 83-115.
- 658 Leff, J. W., Lynch, R. C., Kane, N. C., & Fierer, N. (2017). Plant domestication and the  
659 assembly of bacterial and fungal communities associated with strains of the common sunflower.  
660 *New Phytologist*, 214(1), 412-423.
- 661 Lehmann, A., Barto, E. K., Powell, J. R., & Rillig, M. C. (2012). Mycorrhizal responsiveness  
662 trends in annual crop plants and their wild relatives-a meta-analysis on studies from 1981 to  
663 2010. *Plant and Soil*, 355(1–2), 231–250.
- 664 Leiser, W. L., Olatoye, M. O., Rattunde, H. F. W., Neumann, G., Weltzien, E., & Haussmann,  
665 B. I. (2016). No need to breed for enhanced colonization by arbuscular mycorrhizal fungi to  
666 improve low-P adaptation of West African sorghums. *Plant and soil*, 401(1-2), 51-64.

- 667 Lemanceau, P., Blouin, M., Muller, D., & Moëgne-Loccoz, Y. (2017). Let the core microbiota  
668 be functional. *Trends in Plant Science*, 22(7), 583–595.
- 669 Lundberg, D. S., Lebeis, S. L., Paredes, S. H., Yourstone, S., Gehring, J., Malfatti, S., ... &  
670 Edgar, R. C. (2012). Defining the core *Arabidopsis thaliana* root microbiome. *Nature*,  
671 488(7409), 86-90.
- 672 Mei, C., & Flinn, B. S. (2010). The use of beneficial microbial endophytes for plant biomass  
673 and stress tolerance improvement. *Recent Patents on Biotechnology*, 4(1), 81-95.
- 674 Milla, R., Osborne, C. P., Turcotte, M. M., & Violle, C. (2015). Plant domestication through an  
675 ecological lens. *Trends in ecology & evolution*, 30(8), 463-469.
- 676 Mutch, L. A., & Young, J. P. W. (2004). Diversity and specificity of *Rhizobium leguminosarum*  
677 *biovar viciae* on wild and cultivated legumes. *Molecular Ecology*, 13(8), 2435-2444.
- 678 Peiffer, J. A., Spor, A., Koren, O., Jin, Z., Tringe, S. G., Dangl, J. L., ... & Ley, R. E. (2013).  
679 Diversity and heritability of the maize rhizosphere microbiome under field conditions.  
680 *Proceedings of the National Academy of Sciences*, 110(16), 6548-6553.
- 681 Pérez-Jaramillo, J. E., Carrión, V. J., Bosse, M., Ferrão, L. F., de Hollander, M., Garcia, A. A.,  
682 ... & Raaijmakers, J. M. (2017). Linking rhizosphere microbiome composition of wild and  
683 domesticated *Phaseolus vulgaris* to genotypic and root phenotypic traits. *The ISME journal*,  
684 11(10), 2244-2257.
- 685 Pérez-Jaramillo, J. E., Carrión, V. J., de Hollander, M., & Raaijmakers, J. M. (2018). The wild  
686 side of plant microbiomes. *Microbiome*, 6(1), 143.
- 687 Pérez-Jaramillo, J. E., Mendes, R., & Raaijmakers, J. M. (2016). Impact of plant domestication  
688 on rhizosphere microbiome assembly and functions. *Plant molecular biology*, 90(6), 635-644.

- 689 Ramirez, K. S., Lauber, C. L., Knight, R., Bradford, M. A., & Fierer, N. (2010). Consistent  
690 effects of nitrogen fertilization on soil bacterial communities in contrasting systems. *Ecology*,  
691 91(12), 3463–3470. <https://doi.org/10.1890/10-0426.1>
- 692 Ramirez, K. S., Craine, J. M., & Fierer, N. (2012). Consistent effects of nitrogen amendments  
693 on soil microbial communities and processes across biomes. *Global change biology*, 18(6),  
694 1918-1927.
- 695 Rodriguez, R., & Redman, R. (2008). More than 400 million years of evolution and some plants  
696 still can't make it on their own: plant stress tolerance via fungal symbiosis. *Journal of*  
697 *experimental botany*, 59(5), 1109-1114.
- 698 RStudio Team (2020). RStudio: Integrated Development for R. RStudio, PBC, Boston, MA  
699 URL <http://www.rstudio.com/>.
- 700 Sangabriel-Conde, W., Maldonado-Mendoza, I. E., Mancera-López, M. E., Cordero-Ramírez,  
701 J. D., Trejo-Aguilar, D., & Negrete-Yankelevich, S. (2015). Glomeromycota associated with  
702 Mexican native maize landraces in Los Tuxtlas, Mexico. *Applied Soil Ecology*, 87, 63-71.
- 703 Schmalhausen, I. I. (1949). *Factors of Evolution: The Theory of Stabilizing Selection*.  
704 Blakiston, Philadelphia, PA
- 705 Schöler, A., Jacquiod, S., Vestergaard, G., Schulz, S., Schloter, M., 2017. Analysis of soil  
706 microbial communities based on amplicon sequencing of marker genes. *Biology and Fertility*  
707 *of Soils* 53, 485.
- 708 Shannon, P., Markiel, A., Ozier, O., Baliga, N. S., Wang, J. T., Ramage, D., ... & Ideker, T.  
709 (2003). Cytoscape: a software environment for integrated models of biomolecular interaction  
710 networks. *Genome research*, 13(11), 2498-2504.

- 711 Shi, S., Tian, L., Xu, S., Ji, L., Nasir, F., Li, X., ... & Tian, C. (2019). The rhizomicrobiomes of  
712 wild and cultivated crops react differently to fungicides. *Archives of microbiology*, 201(4), 477-  
713 486.
- 714 Stearns, S. C. (1989). The Evolutionary Significance of Phenotypic Plasticity. *BioScience*,  
715 39(7), 436–445. <https://doi.org/10.2307/1311135>
- 716 Szoboszlay, M., Lambers, J., Chappell, J., Kupper, J. V., Moe, L. A., & McNear Jr, D. H.  
717 (2015). Comparison of root system architecture and rhizosphere microbial communities of  
718 Balsas teosinte and domesticated corn cultivars. *Soil Biology and Biochemistry*, 80, 34-44.
- 719 Trouvelot, A., Kough, J.L., and Gianinazzi-Pearson, V. (1986). “Mesure du taux de  
720 mycorhization VA d’un système racinaire. Recherche de methodes d’estimation ayant une  
721 signification fonctionnelle.” In *Physiological and Genetical Aspects of Mycorrhizae*.  
722 *Proceedings of the 1st European Symposium on Mycorrhizae*, eds V.Gianinazzi-Pearson and  
723 S.Gianinazzi (Paris: Institut National de la Recherche Agronomique), 217–221.
- 724 Turcotte, M. M., Lochab, A. K., Turley, N. E., & Johnson, M. T. (2015). Plant domestication  
725 slows pest evolution. *Ecology letters*, 18(9), 907-915.
- 726 Valente, J., Gerin, F., Le Gouis, J., Moëgne-Loccoz, Y., & Prigent–Combaret, C. (2020).  
727 Ancient wheat varieties have a higher ability to interact with plant growth-promoting  
728 rhizobacteria. *Plant, Cell & Environment*, 43(1), 246-260.
- 729 Vierheilig, H., Coughlan, A.P., Wyss, U., Piché, Y., 1998. Ink and vinegar, a simple staining  
730 technique for arbuscular-mycorrhizal fungi. *Appl. Environ. Microbiol.* 64, 5004–5007.  
731 <https://doi.org/10.1128/aem.64.12.5004-5007.1998>

732 Wagner, M. R., Lundberg, D. S., Tijana, G., Tringe, S. G., Dangl, J. L., & Mitchell-Olds, T.  
733 (2016). Host genotype and age shape the leaf and root microbiomes of a wild perennial plant.  
734 Nature communications, 7(1), 1-15.

735 Weese, D. J., Heath, K. D., Dentinger, B. T., & Lau, J. A. (2015). Long-term nitrogen addition  
736 causes the evolution of less-cooperative mutualists. Evolution, 69(3), 631-642.

737 Zhu, Y., Christie, P., & Laidlaw, A. S. (2001). Uptake of Zn by arbuscular mycorrhizal white  
738 clover from Zn-contaminated soil. Chemosphere, 42(2), 193-199.

739

740



741 **FIGURE LEGENDS**

742 **Figure 1:** Alpha-diversity of the rhizosphere bacterial community (16S rRNA gene amplicon  
743 sequencing), presented as reaction norms of ancient and modern wheat genotypes to the  
744 environment modification by inputs. Panel are respectively showing: the richness (A), the  
745 Chao-1 estimator (B), the ACE estimator (C), the Simpson reciprocal index (D), the Shannon  
746 index (E) and the Equitability of Pielou (F). Data is shown as the interaction between the  
747 breeding type and the presence/absence of inputs (w/o: without inputs; w: with inputs).  
748 Significance was inferred with an ANOVA under the Tukey's HSD post-hoc test for normally  
749 distributed data (Honest Significant Detection,  $p < 0.05$ ). Non-parametric data were analyzed  
750 with a Kruskal-Wallis test under False Discovery Rate post-hoc correction (FDR,  $p < 0.05$ ).

751 **Figure 2:** Beta-diversity analysis of the bacterial (A) and fungal (B) communities using partial  
752 distance-based redundancy analysis (db-RDA). Partial db-RDA were used to output the  
753 following constrained models: breeding type + Condition (block) (10,000 permutations).

754 **Figure 3:** Alpha-diversity of the rhizosphere fungal community (ITS2 gene amplicon  
755 sequencing), presented as reaction norms of ancient and modern wheat genotypes to the  
756 environment modification by inputs. Panel are respectively showing: the richness (A), the  
757 Chao-1 estimator (B), the ACE estimator (C), the Simpson reciprocal index (D), the Shannon  
758 index (E) and the Equitability of Pielou (F). Data is shown as the interaction between the  
759 breeding type and the presence/absence of inputs (w/o: without inputs; w: with inputs).  
760 Significance was inferred with an ANOVA under the Tukey's HSD post-hoc test for normally  
761 distributed data (Honest Significant Detection,  $p < 0.05$ ). Non-parametric data were analyzed  
762 with a Kruskal-Wallis test under False Discovery Rate post-hoc correction (FDR,  $p < 0.05$ ).

763 **Figure 4:** Network analysis of the rhizosphere microbiota associated to the modern and ancient  
764 wheat varieties. The networks were constructed using dominant OTUs (sum min = 100 counts,

765 occurrence = 25/51 for bacteria, and 25/50 for fungi) and based on partial correlations obtained  
766 with Poisson Log Normal models combining the bacterial and fungal datasets together ( $\sim 1 +$   
767 block + offset). For visualization, both networks were merged into one, and shown twice with  
768 edges that are unique of modern varieties highlighted on the left network (pink), and edges that  
769 are unique of the ancient varieties highlighted on the right network (khaki). Common link are  
770 highlighted in both networks in deep blue. Hidden links are corresponding to modern/ancient  
771 edges respectively not shown in each network. Barcharts represent average network complexity  
772 indices estimated from edges or nodes (Kruskal-Wallis test,  $p < 0.05$ ).

773 **Figure 5:** Mycorrhizal colonization for breeding types and inputs. Panel are respectively  
774 showing: the intensity of mycorrhizal colonization in root system (A), the intensity of  
775 mycorrhizal colonization in root fragment (B), the arbuscular abundance in root system (C), the  
776 arbuscular abundance in root fragment (D) in response to the breeding types (whatever the  
777 presence of inputs) and the intensity of mycorrhizal colonization in root system (E) and the  
778 intensity of mycorrhizal colonization in root fragment (F) in response to inputs (whatever the  
779 breeding type). Significance was inferred with an ANOVA under the Tukey's HSD post-hoc  
780 test for normally distributed data (Honest Significant Detection,  $p < 0.05$ ). Non-parametric data  
781 were analyzed with a Kruskal-Wallis test under False Discovery Rate post-hoc correction  
782 (FDR,  $p < 0.05$ ).

### 783 TABLES LEGENDS

784 **Table 1:** Analysis of variance and Kruskal-Wallis tests for bacterial alpha diversity indices. F  
785 and chi-square ( $\chi^2$ ) values are given, with asterisks indicating the significance of effects.  
786 "Block" is the factor identifying the three repeated blocks in the experimental design.  
787 "Inputs:Breeding type:Variety" is an error term for the variance explained by the variety inside  
788 each breeding type. For non-parametric data, Kruskal-Wallis tests were done individually on  
789 each factor or factor combinations. The directions of significant effects are indicated. w,

790 presence of inputs; w/o, absence of inputs; Mod., modern varieties; Anc., ancient varieties; ` ,  $p$   
791  $< 0.10$ ; \*,  $p < 0.05$ ; \*\*,  $p < 0.01$ ; \*\*\*,  $p < 0.001$ .

792 **Table 2:** Permutational analysis of variance for bacterial and fungal alpha diversity based on  
793 the six diversity indices (Richness, Chao-1, ACE, Simpson reciprocal, Shannon and  
794 Equitability) and for parameters describing mycorrhizal colonization (F, M, m, A and a, see  
795 Materials and Methods for a description). F values are given, with asterisks indicating the  
796 significance of effects. ` ,  $p < 0.10$ ; \*,  $p < 0.05$ ; \*\*,  $p < 0.01$ ; \*\*\*,  $p < 0.001$ .

797 **Table 3:** Permutational analysis of variance for bacterial (16S) and fungal (ITS) beta diversity.  
798 F values are given, with asterisks indicating the significance of effects. The directions of effects  
799 are indicated. Mod., modern varieties; Anc., ancient varieties; ` ,  $p < 0.10$ ; \*,  $p < 0.05$ ; \*\*,  $p <$   
800  $0.01$ ; \*\*\*,  $p < 0.001$ .

801 **Table 4:** Analysis of variance and Kruskal-Wallis tests for fungal alpha diversity indices. F and  
802 chi-square ( $\chi^2$ ) values are given, with asterisks indicating the significance of effects. “Block” is  
803 the factor identifying the three repeated blocks in the experimental design. “Inputs:Breeding  
804 type:Variety” is an error term for the variance explained by the variety inside each breeding  
805 type. For non-parametric data, Kruskal-Wallis tests were done individually on each factor or  
806 factor combinations. The directions of significant effects are indicated. w, presence of inputs;  
807 w/o, absence of inputs; Mod., modern varieties; Anc., ancient varieties; ` ,  $p < 0.10$ ; \*,  $p < 0.05$ ;  
808 \*\*,  $p < 0.01$ ; \*\*\*,  $p < 0.001$ .

809 **Table 5:** Analysis of variance and Kruskal-Wallis tests for myccorhiza indices. F and chi-  
810 square ( $\chi^2$ ) values are given, with asterisks indicating the significance of effects. “Block” is  
811 the factor identifying the three repeated blocks in the experimental design. “Series” refers to  
812 the two different batches of staining of mycorrhiza. “Inputs:Breeding type:Variety” is an error  
813 term for the variance explained by the variety inside each breeding type. For non-parametric

814 data, Kruskal-Wallis tests were done individually on each factor or factor combinations. The  
815 directions of significant effects are indicated. w, presence of inputs; w/o, absence of inputs;  
816 M, modern varieties; A, ancient varieties;  $\cdot$ ,  $p < 0.10$ ; \*,  $p < 0.05$ ; \*\*,  $p < 0.01$ ; \*\*\*,  $p <$   
817 0.001.

818

819 **FIGURES**

820 **Figure 1: Bacterial alpha-diversity analysis**

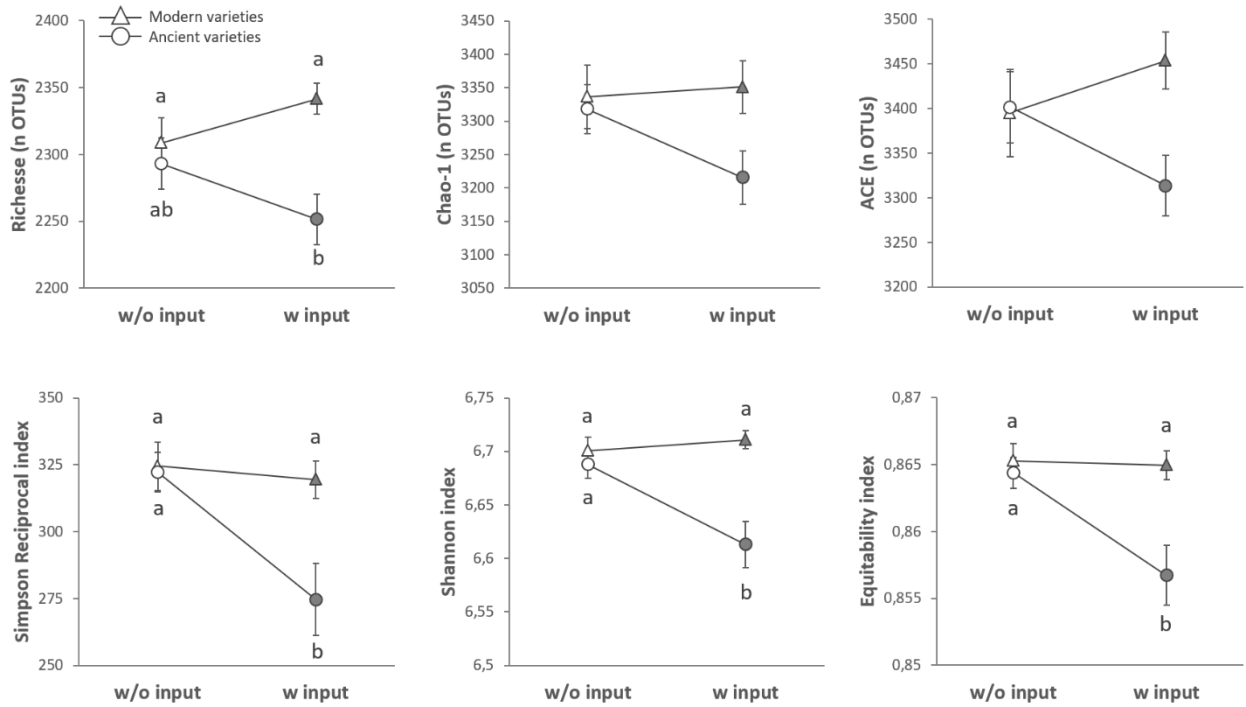

821

822

823

824 **Figure 2:** Rhizosphere microbiota beta-diversity analysis

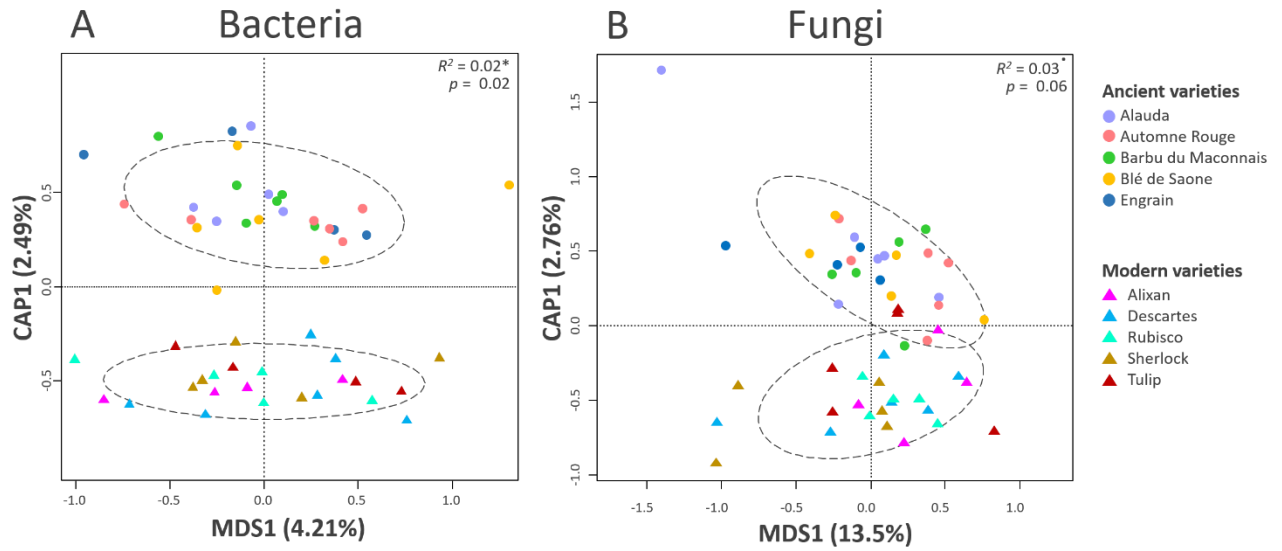

825

826

827 **Figure 3:** Fungal alpha-diversity analysis

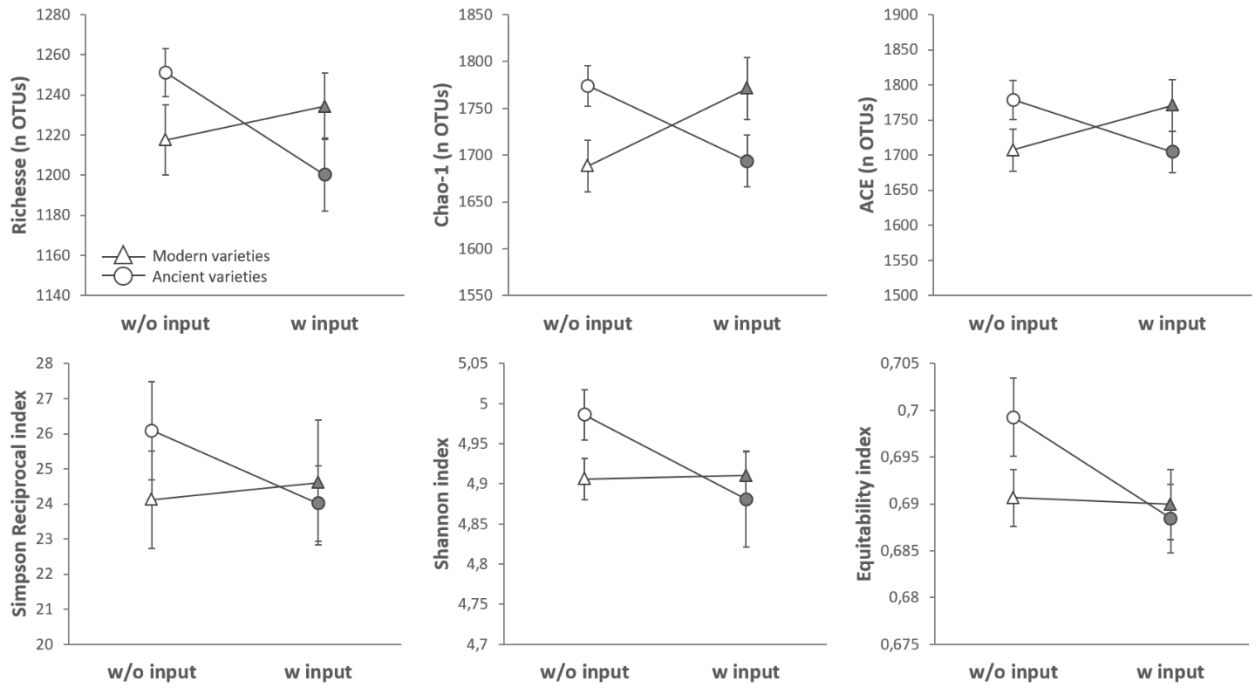

828

829

830 **Figure 4:** Rhizosphere microbiota network analysis

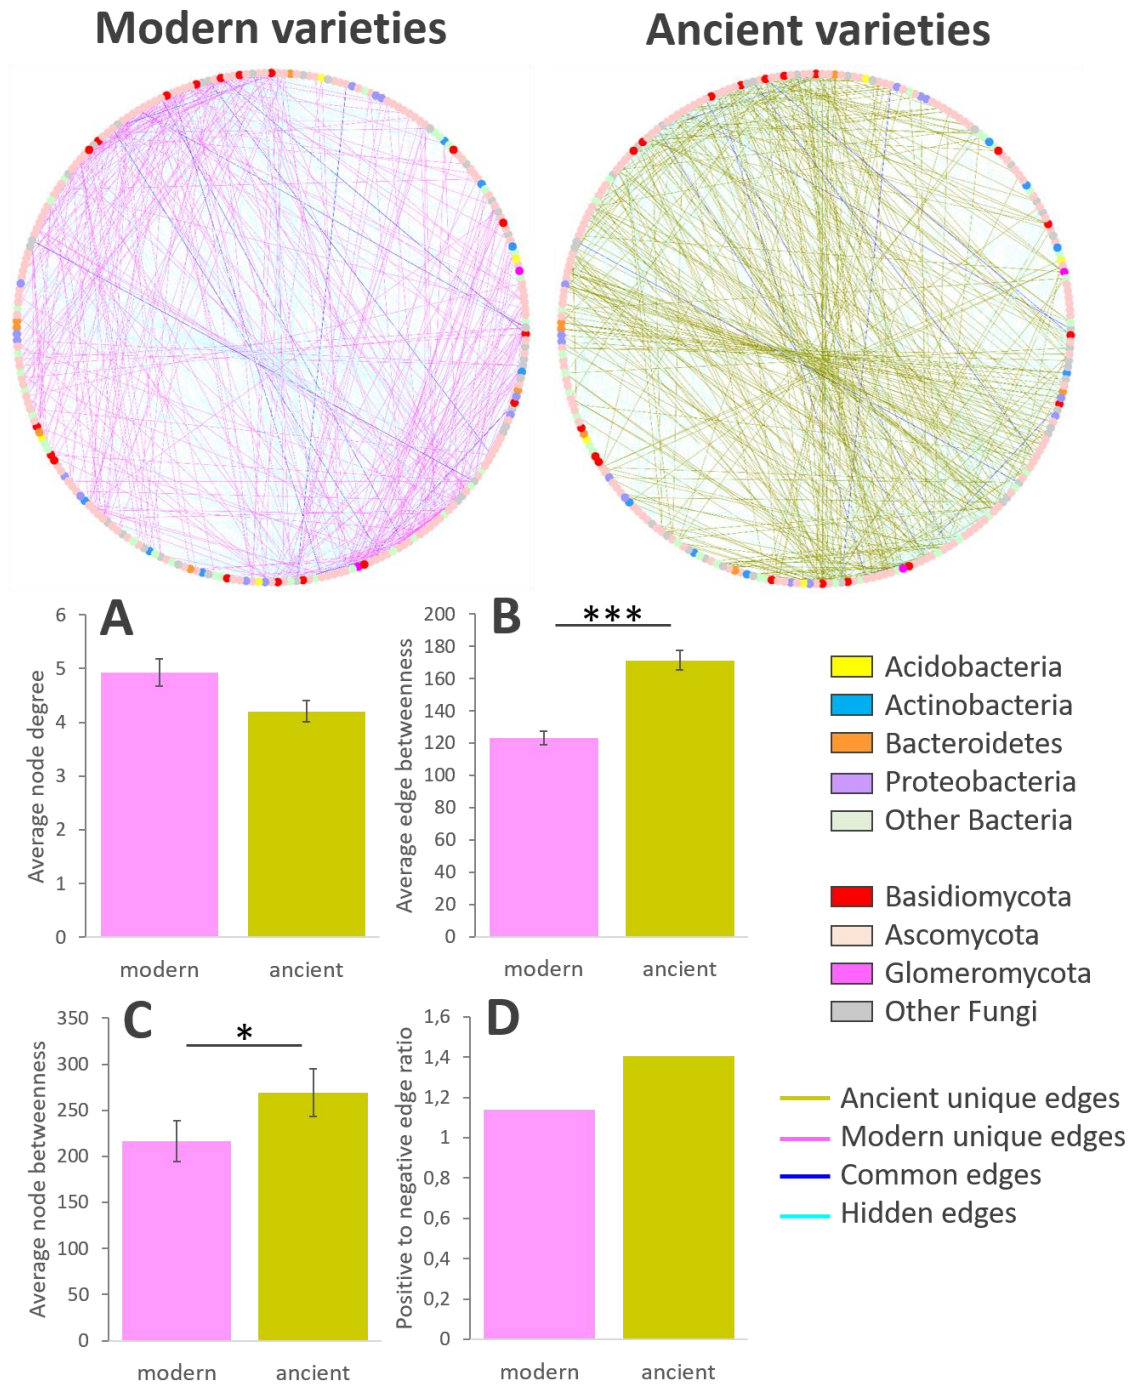

831

832



833 **Figure 5: Mycorrhiza analysis**

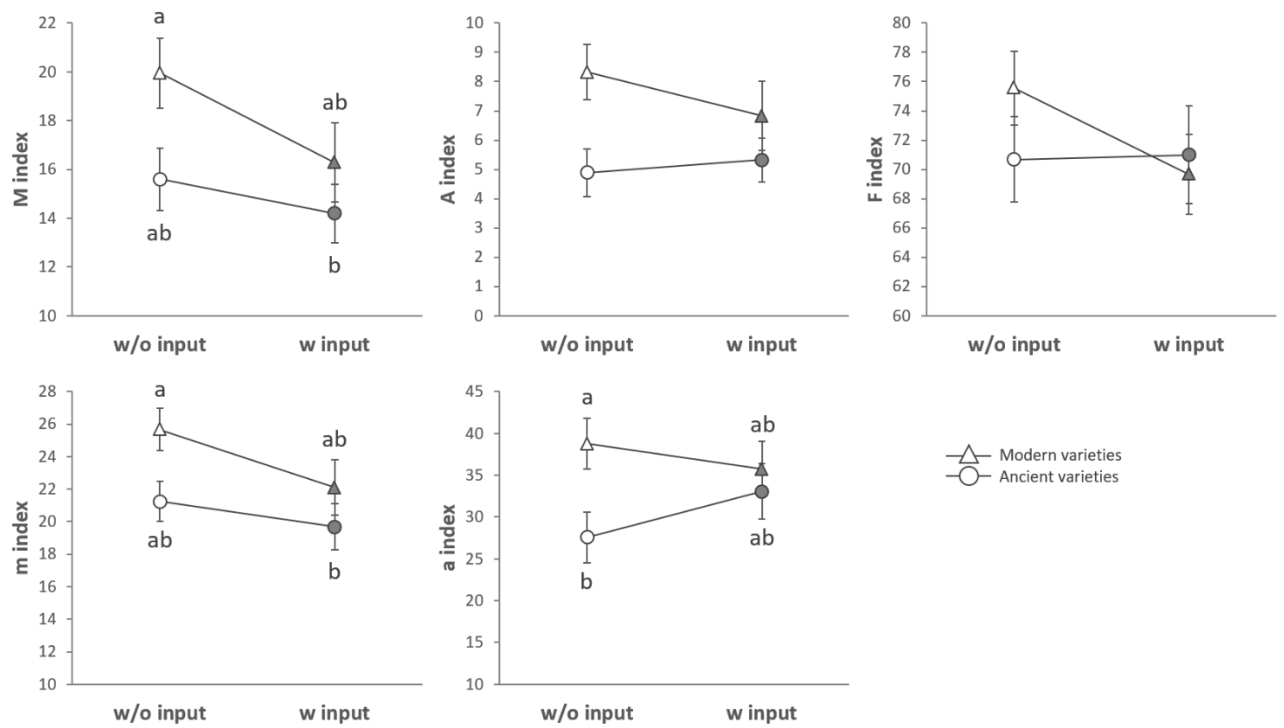

834

835

837 **Table 1:** Bacterial alpha-diversity univariate analysis

| <b>Factors</b>                      | <b>Richness (F)</b> | <b>Chao-1 (F)</b>              | <b>ACE (F)</b> | <b>Simpson reciprocal (<math>\chi^2</math>)</b> | <b>Shannon (<math>\chi^2</math>)</b> | <b>Equitability (<math>\chi^2</math>)</b> |
|-------------------------------------|---------------------|--------------------------------|----------------|-------------------------------------------------|--------------------------------------|-------------------------------------------|
| Inputs                              | 0.063               | 1.688                          | 0.207          | 3.914*                                          | 1.278                                | 3.622 .                                   |
| Breeding type                       | 14.81***            | 5.586*                         | 4.436*         | 4.077*                                          | 9.578**                              | 6.300*                                    |
| Block                               | 0.043               | 0.444                          | 0.437          | 5.233 .                                         | 2.611                                | 4.972 .                                   |
| Inputs x Breeding type              | 7.363*              | 3.412 .                        | 5.151*         | 10.83*                                          | 15.64**                              | 12.50**                                   |
| Inputs x Breeding type/Variety      | 2.740**             | 2.528*                         | 2.247*         | 10.10                                           | 14.31                                | 11.64                                     |
| Direction of effects                | Mod. > Anc.         | Mod. > Anc.<br>w/o > w in Anc. |                | w/o > w<br>Mod. > Anc.<br>w/o > w in Anc.       | Mod. > Anc.<br>w/o > w in Anc.       | w/o > w in Anc.                           |
| R <sup>2</sup> (variance explained) | 0.695               | 0.642                          | 0.616          | na                                              | na                                   | na                                        |

839 **Table 2:** Alpha-diversity and mycorrhiza multivariate analysis

840

| <b>PERMANOVA</b>                    | <b>R<sup>2</sup> (Bacteria)</b> | <b>R<sup>2</sup> (Fungi)</b> | <b>R<sup>2</sup> (Myco)</b> |
|-------------------------------------|---------------------------------|------------------------------|-----------------------------|
| Input                               | 0.014                           | 0.004                        | 0.008                       |
| Breeding                            | 0.074*                          | 1.7E-05                      | 0.028**                     |
| Input x Breeding                    | 0.057*                          | 0.105*                       | 0.011                       |
| Input x Breeding/variety            | 0.478*                          | 0.118                        | 0.188**                     |
| Block                               | 0.012                           | 0.046                        | 0.028*                      |
| Residual                            | 0.365                           | 0.727                        | 0.737                       |
| R <sup>2</sup> (variance explained) | 0.635                           | 0.273                        | 0.263                       |

841

842 **Table 3:** Rhizosphere microbiota beta-diversity analysis

| <b>Factors</b>                 | <b>Bacteria (16S rRNA gene)</b> | <b>Fungi (ITS2 fragment)</b> |
|--------------------------------|---------------------------------|------------------------------|
| Inputs                         | 0.018                           | 0.022                        |
| Breeding type                  | 0.027*                          | 0.025*                       |
| Block                          | 0.065***                        | 0.054*                       |
| Inputs x Breeding type         | 0.019                           | 0.017                        |
| Inputs x Breeding type/Variety | 0.308                           | 0.347*                       |
| Residual                       | 0.564                           | 0.535                        |

843

844 **Table 4:** Fungal alpha-diversity univariate analysis

| <b>Factors</b>                      | <b>Richness (F)</b> | <b>Chao-1 (F)</b>                  | <b>ACE (F)</b>                     | <b>Simpson reciprocal (<math>\chi^2</math>)</b> | <b>Shannon (F)</b>            | <b>Equitability (F)</b> |
|-------------------------------------|---------------------|------------------------------------|------------------------------------|-------------------------------------------------|-------------------------------|-------------------------|
| Inputs                              | 1.002               | 0.005                              | 0.048                              | 0.746                                           | 4.457*                        | 3.601 .                 |
| Breeding type                       | 0.001               | 0.012                              | 0.004                              | 1.141                                           | 0.899                         | 1.124                   |
| Block                               | 0.924               | 1.148                              | 0.677                              | 4.557 .                                         | 6.571**                       | 5.987**                 |
| Inputs x Breeding type              | 2.845               | 5.624*                             | 3.097 .                            | 2.590                                           | 3.035 .                       | 1.413                   |
| Inputs x Breeding type/Variety      | 0.298               | 0.282                              | 0.282                              | 10.40                                           | 1.049                         | 1.277                   |
| Direction of effects                |                     | w/o < w in Mod.<br>w/o > w in Anc. | w/o < w in Mod.<br>w/o > w in Anc. |                                                 | w/o > w<br>Mod. < Anc. in w/o | w/o>w                   |
| R <sup>2</sup> (explained variance) | 0.272               | 0.308                              | 0.243                              | na                                              | 0.578                         | 0.579                   |

845

846 **Table 5:** Mycorrhiza univariate analysis

| <b>Factors</b>                      | <b>M (F)</b>           | <b>m (F)</b>           | <b>a (F)</b> | <b>A (<math>\chi^2</math>)</b> | <b>F (<math>\chi^2</math>)</b> |
|-------------------------------------|------------------------|------------------------|--------------|--------------------------------|--------------------------------|
| Inputs                              | 5.03*                  | 4.06*                  | 0.18         | 0.628                          | 0.872                          |
| Breeding type                       | 8.08**                 | 7.12**                 | 5.75*        | 5.591*                         | 0.122                          |
| Series                              | 25.93***               | 6.97**                 | 13.62***     | 16.14***                       | 31.70***                       |
| Block                               | 3.91*                  | 3.03*                  | 0.97         | 2.771                          | 4.487                          |
| Inputs x Breeding type              | 0.99                   | 0.62                   | 2.19         | 8.824*                         | 2.838                          |
| Inputs x Breeding type/Variety      | 2.80***                | 2.21**                 | 1.86*        | 10.70                          | 3.211                          |
| Direction of effects                | Mod. > Anc.<br>w/o > w | Mod. > Anc.<br>w/o > w | Mod. > Anc.  | Mod. > Anc.                    |                                |
| R <sup>2</sup> (explained variance) | 0.489                  | 0.383                  | 0.355        | na                             | na                             |

847
